# Supplementary material
Source: MDPI journal article supplement (https://www.mdpi.com/2077-1312/9/9/953)
Supplement: s1 [file s1]

**Acidification and deoxygenation north-western part of the Japan/East  
Sea**

Pavel Tishchenko, Vyacheslav Lobanov, Dmitriy Kaplunenko, Sergey Sagalaev, Petr  
Tishchenko

V.I. Il'ichev Pacific Oceanological Institute, Far Eastern Branch,  
Russian Academy of Sciences, Vladivostok, Russia E-mail:  
[tpavel@poi.dvo.ru](mailto:tpavel@poi.dvo.ru)

**Supplementary Information**

**Inter-calibration of nutrients 2012, carried out by Prof. Aoyama,  
Tsukuba**

**Ranked results for all samples number including POI lab, which number is 42.**

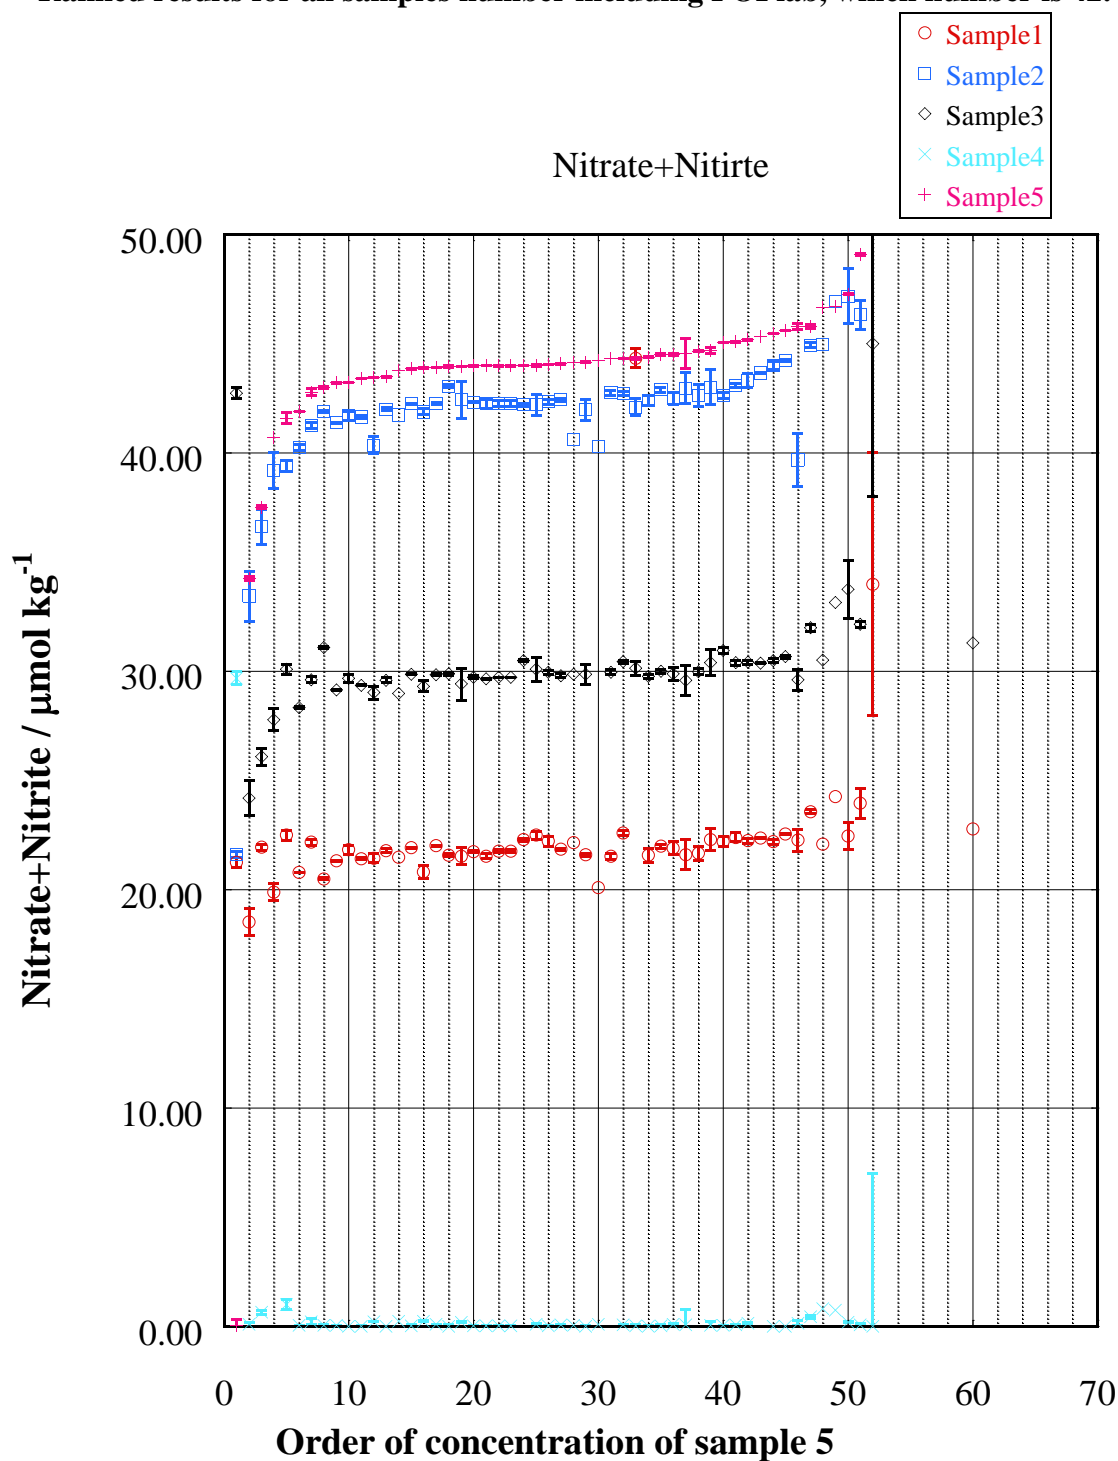

**Figure S1** Ranked Nitrite+Nitrate results for all samples: Reported concentrations were sorted using concentration of sample 5

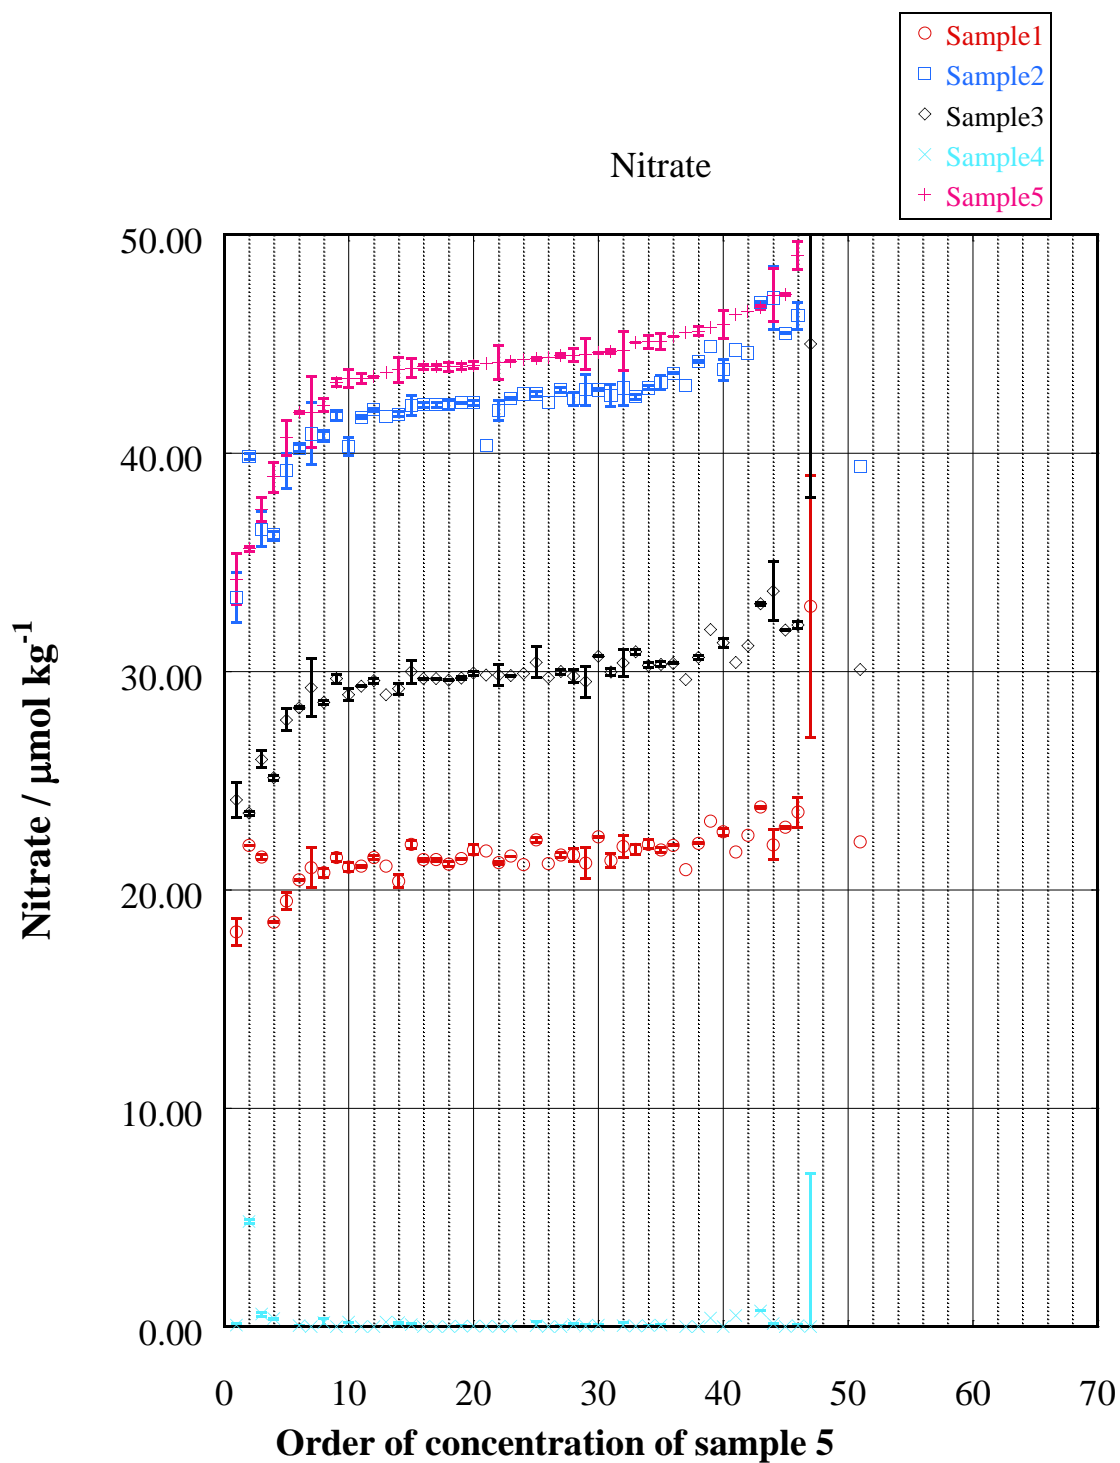

**Figure S2** Ranked Nitrate results for all samples: Reported concentrations were sorted using concentration of sample 5

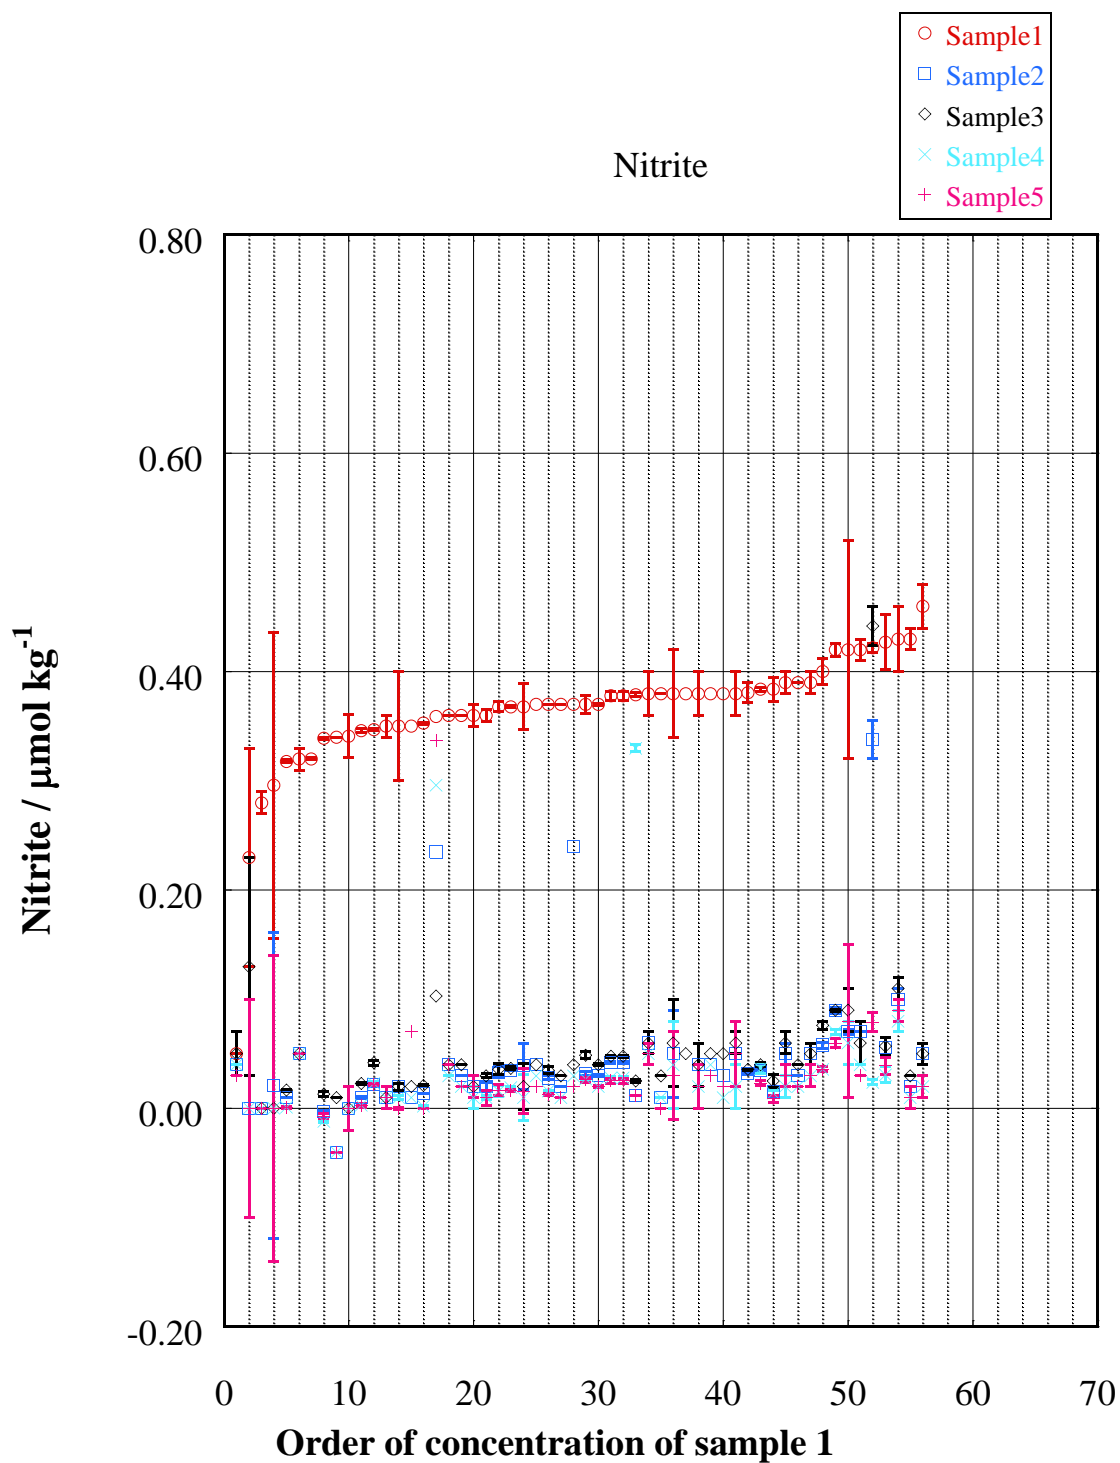

**Figure S3** Ranked Nitrite results for all samples: Reported concentrations were sorted using concentration of sample1

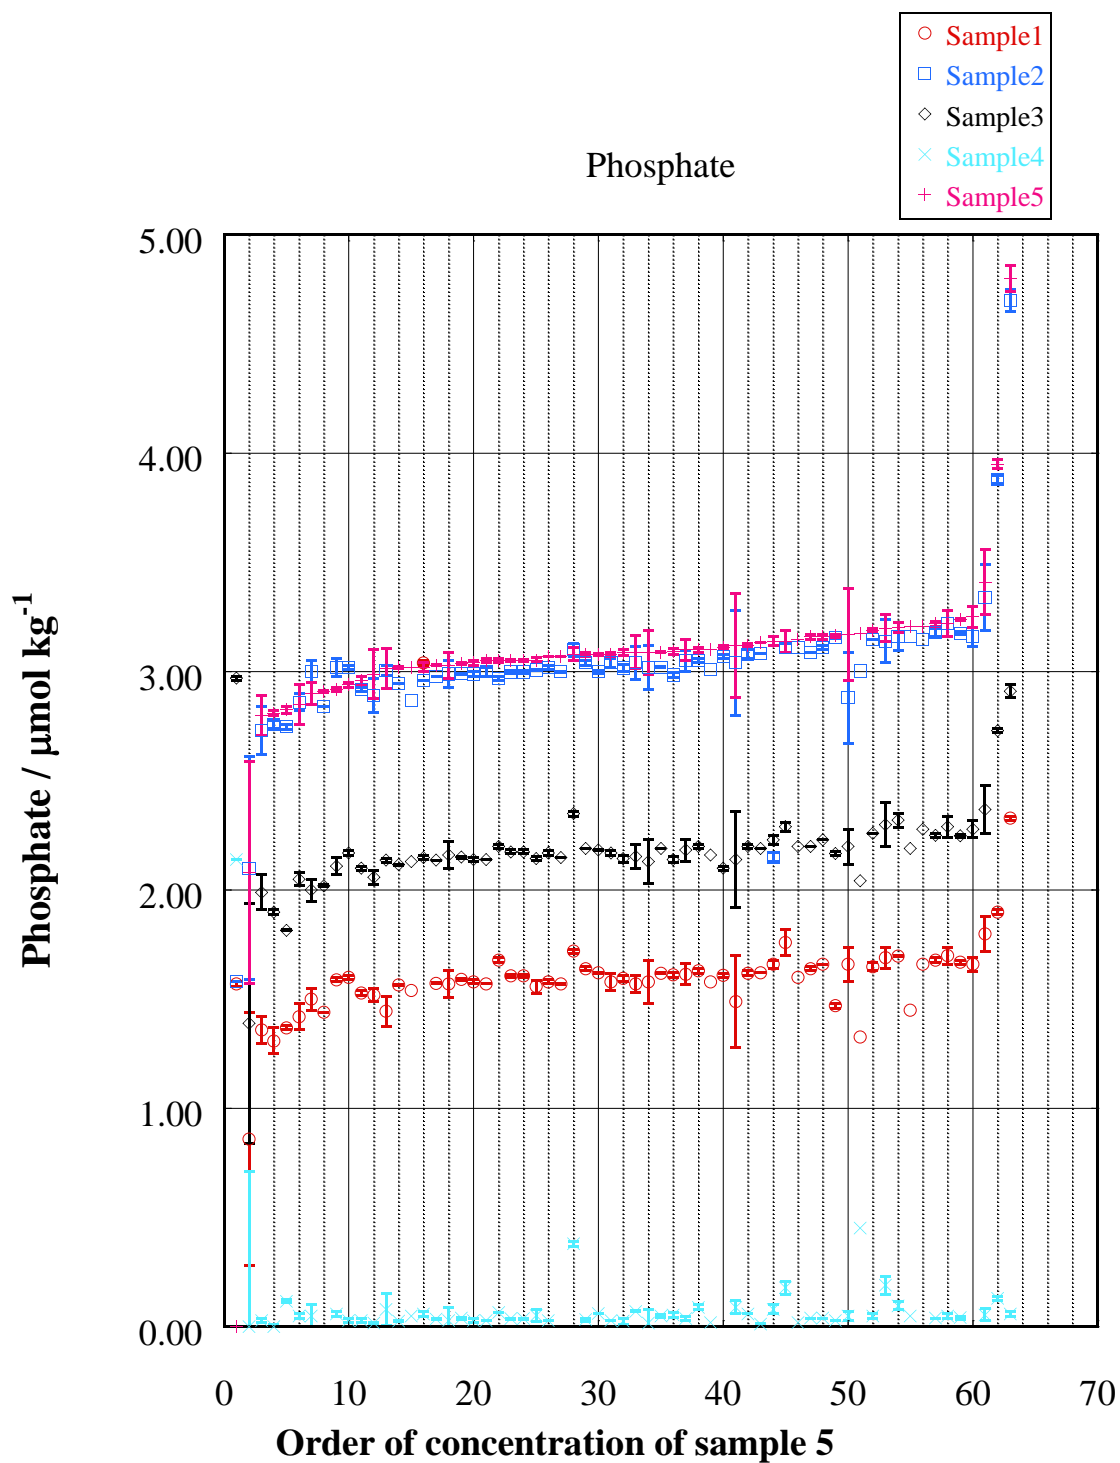

**Figure S4** Ranked Phosphate results for all samples: Reported concentrations were sorted using concentration of sample 5

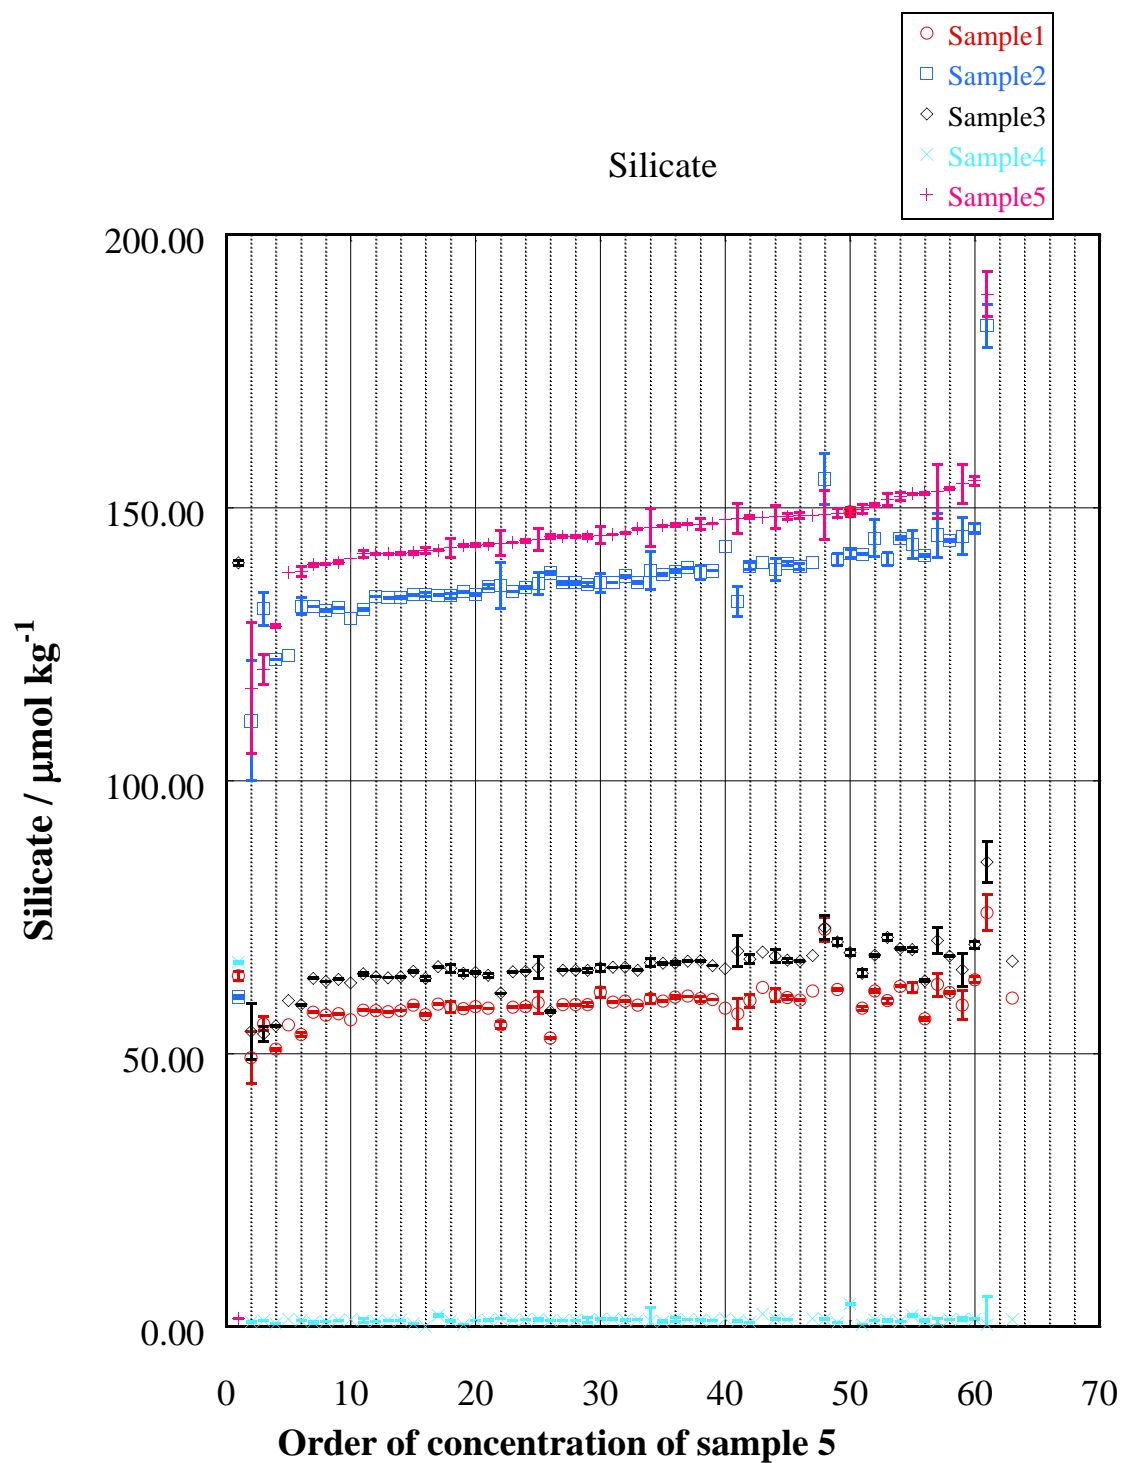

**Figure S5** Ranked silicate results for all samples: Reported concentrations were sorted using concentration of sample 5

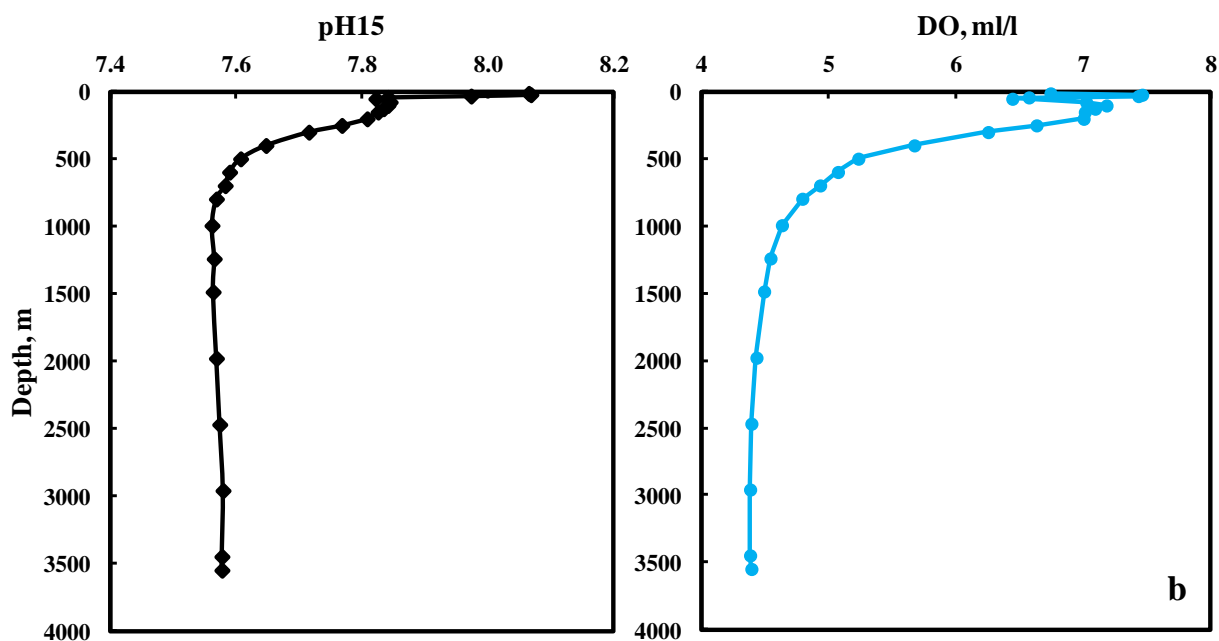

**Figure S6.** Vertical distribution of  $\text{pH}_T(15^\circ\text{C})$  – **a** and dissolved oxygen – **b** in water column. Station CR-02, KH-10-02 cruise, June 2010, Japan/East Sea.

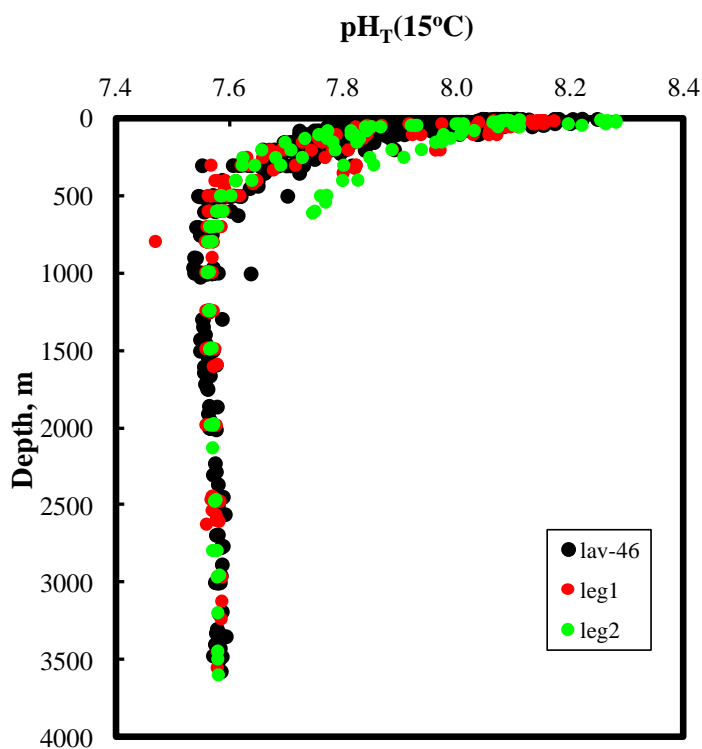

**Figure S7.** Comparison of pH data measured at  $15^\circ\text{C}$  in “total hydrogen concentration scale” for Japan Sea. **Black** is Lavretyev cruise in 2009; **Red** is Hakuho-Mar 2010, leg1; **Green** is Hakuho-Mar 2010, leg 2.

Figures S6, S7 suggest that precision and accuracy of pH measurements are very similar and better than 0.01 unit pH. Data demonstrated by Fig. S7 were obtained different peoples in different time, using different equipment. Scatter of data below 2000 m is within 0.01 pH unit.

**Table S1.** The average hydrochemical parameters ([DO], [P], [NO<sub>3</sub><sup>-</sup>], [Si], n- number of measurements, 3s.d.(mean) = 3s.d./√n , where s.d. – standard deviation) of the JES at nominal depths for different years

| Depth, m | year | [DO],<br>μmol/kg | n   | 3s.d.<br>(mean) | [P],<br>μmol/kg | n   | 3s.d.<br>(mean) | [NO <sub>3</sub> <sup>-</sup> ],<br>μmol/kg | n   | 3s.d.<br>(mean) | [Si],<br>μmol/kg | n   | 3s.d.<br>(mean) |
|----------|------|------------------|-----|-----------------|-----------------|-----|-----------------|---------------------------------------------|-----|-----------------|------------------|-----|-----------------|
| 750      | 1999 | 226.2            | 106 | 4.98            | 1.86            | 106 | 0.039           | 23.49                                       | 106 | 0.49            | 53.74            | 106 | 1.99            |
| 750      | 2001 | 234.6            | 32  | 6.87            | 1.80            | 32  | 0.044           | 22.78                                       | 32  | 0.60            | 50.43            | 32  | 1.90            |
| 750      | 2001 | 245.4            | 21  | 7.28            | 1.70            | 21  | 0.056           | 21.74                                       | 21  | 0.82            | 47.38            | 21  | 4.12            |
| 750      | 2004 | 230.5            | 25  | 8.06            | 1.82            | 25  | 0.042           | 23.20                                       | 25  | 0.46            | 53.31            | 25  | 2.72            |
| 750      | 2005 | 228.3            | 12  | 8.84            | 1.80            | 12  | 0.075           | 22.92                                       | 4   | 0.97            | 50.03            | 12  | 3.18            |
| 750      | 2007 | 221.7            | 14  | 7.07            | 1.87            | 14  | 0.053           | 22.45                                       | 14  | 0.58            | 54.14            | 14  | 3.23            |
| 750      | 2009 | 222.5            | 24  | 4.97            | 1.88            | 24  | 0.041           | 22.23                                       | 24  | 1.39            | 54.84            | 24  | 3.45            |
| 750      | 2010 | 216.5            | 12  | 7.22            | 1.91            | 12  | 0.050           | 24.97                                       | 12  | 0.60            | 55.27            | 12  | 2.63            |
| 750      | 2014 | 210.4            | 29  | 3.94            | 1.97            | 25  | 0.035           | 24.54                                       | 29  | 0.52            | 54.92            | 0   | 2.37            |
| 750      | 2014 | 213.3            | 20  | 8.16            | 1.92            | 20  | 0.068           | 24.54                                       | 20  | 0.52            | 54.92            | 20  | 2.37            |
| 1250     | 1999 | 216.3            | 50  | 1.58            | 1.93            | 50  | 0.011           | 24.39                                       | 50  | 0.11            | 66.89            | 50  | 1.91            |
| 1250     | 2001 | 218.5            | 30  | 3.20            | 1.93            | 30  | 0.019           | 24.26                                       | 30  | 0.19            | 67.32            | 30  | 0.95            |
| 1250     | 2001 | 220.6            | 16  | 3.63            | 1.87            | 16  | 0.025           | 23.97                                       | 16  | 0.28            | 64.87            | 16  | 3.77            |
| 1250     | 2004 | 214.1            | 21  | 1.85            | 1.93            | 20  | 0.039           | 24.48                                       | 19  | 0.27            | 67.56            | 20  | 2.05            |
| 1250     | 2005 | 212.8            | 11  | 3.21            | 1.89            | 12  | 0.060           | 24.27                                       | 6   | 1.06            | 64.95            | 12  | 2.22            |
| 1250     | 2007 | 211.9            | 7   | 1.48            | 1.94            | 7   | 0.013           | 23.31                                       | 7   | 0.18            | 69.16            | 7   | 2.40            |
| 1250     | 2007 | 211.3            | 14  | 1.31            | 1.94            | 14  | 0.020           | 23.63                                       | 14  | 0.24            | 70.12            | 14  | 1.30            |
| 1250     | 2009 | 209.8            | 18  | 1.66            | 1.99            | 18  | 0.029           | 23.50                                       | 18  | 1.30            | 71.82            | 18  | 2.16            |
| 1250     | 2010 | 203.7            | 10  | 1.58            | 2.00            | 10  | 0.013           | 26.08                                       | 10  | 0.14            | 69.97            | 10  | 0.97            |
| 1250     | 2014 | 202.9            | 28  | 0.57            | 2.01            | 24  | 0.017           | 24.98                                       | 28  | 0.44            | 70.08            | 28  | 1.14            |
| 1250     | 2014 | 202.4            | 15  | 0.92            | 2.01            | 15  | 0.018           | 25.20                                       | 15  | 0.39            | 68.59            | 15  | 1.66            |
| 1750     | 1999 | 210.4            | 36  | 0.87            | 1.97            | 36  | 0.008           | 24.91                                       | 36  | 0.07            | 76.17            | 36  | 1.27            |
| 1750     | 2001 | 211.3            | 28  | 0.56            | 1.96            | 28  | 0.017           | 24.77                                       | 28  | 0.14            | 77.05            | 28  | 0.84            |
| 1750     | 2001 | 212.4            | 16  | 1.62            | 1.93            | 16  | 0.017           | 24.43                                       | 15  | 0.20            | 75.30            | 16  | 1.95            |



|      |      |       |    |      |      |    |       |       |    |      |       |    |      |
|------|------|-------|----|------|------|----|-------|-------|----|------|-------|----|------|
| 1750 | 2004 | 210.6 | 18 | 1.46 | 1.98 | 16 | 0.026 | 24.72 | 15 | 0.28 | 76.19 | 16 | 1.78 |
| 1750 | 2005 | 209.4 | 9  | 1.85 | 1.92 | 10 | 0.057 | 24.41 | 5  | 0.70 | 73.92 | 10 | 1.58 |
| 1750 | 2007 | 208.7 | 7  | 1.19 | 1.97 | 7  | 0.010 | 23.66 | 7  | 0.15 | 78.28 | 7  | 2.34 |
| 1750 | 2009 | 207.6 | 16 | 0.62 | 1.98 | 16 | 0.016 | 24.17 | 16 | 1.11 | 80.77 | 16 | 0.87 |
| 1750 | 2010 | 202.2 | 8  | 1.12 | 2.02 | 8  | 0.008 | 26.39 | 8  | 0.18 | 78.31 | 8  | 1.37 |
| 1750 | 2014 | 202.6 | 26 | 0.40 | 2.01 | 22 | 0.017 | 25.13 | 25 | 0.43 | 77.56 | 25 | 0.67 |
| 1750 | 2014 | 202.3 | 15 | 0.94 | 2.02 | 15 | 0.017 | 25.42 | 15 | 0.28 | 76.22 | 15 | 0.90 |
| 2250 | 1999 | 209.7 | 36 | 0.77 | 1.99 | 36 | 0.005 | 25.11 | 36 | 0.04 | 81.36 | 36 | 0.85 |
| 2250 | 2001 | 210.6 | 24 | 0.52 | 1.99 | 24 | 0.021 | 25.15 | 24 | 0.15 | 83.01 | 24 | 1.14 |
| 2250 | 2001 | 213.4 | 18 | 2.74 | 1.94 | 18 | 0.031 | 24.41 | 18 | 0.29 | 78.58 | 18 | 2.52 |
| 2250 | 2004 | 209.5 | 17 | 1.71 | 2.00 | 16 | 0.001 | 24.83 | 16 | 0.25 | 81.45 | 16 | 1.66 |
| 2250 | 2005 | 209.2 | 8  | 0.78 | 1.94 | 8  | 0.061 | 24.73 | 5  | 0.61 | 78.55 | 8  | 1.64 |
| 2250 | 2007 | 208.5 | 7  | 0.45 | 1.99 | 7  | 0.013 | 23.85 | 7  | 0.18 | 83.09 | 7  | 1.09 |
| 2250 | 2009 | 207.5 | 15 | 1.02 | 2.04 | 15 | 0.014 | 24.76 | 15 | 0.94 | 85.86 | 15 | 0.79 |
| 2250 | 2010 | 202.7 | 6  | 0.54 | 2.03 | 6  | 0.011 | 26.51 | 6  | 0.17 | 82.48 | 6  | 0.73 |
| 2250 | 2014 | 203.1 | 19 | 0.61 | 2.03 | 15 | 0.013 | 25.52 | 19 | 0.40 | 82.40 | 19 | 0.60 |
| 2250 | 2014 | 202.6 | 11 | 0.97 | 2.04 | 11 | 0.017 | 25.32 | 11 | 0.52 | 80.74 | 11 | 1.29 |
| 3000 | 1999 | 211.1 | 51 | 0.38 | 1.99 | 51 | 0.003 | 25.11 | 51 | 0.03 | 82.70 | 51 | 0.24 |
| 3000 | 2001 | 212.9 | 32 | 1.03 | 1.99 | 33 | 0.021 | 25.15 | 33 | 0.15 | 83.01 | 33 | 1.14 |
| 3000 | 2001 | 214.2 | 32 | 1.42 | 1.94 | 32 | 0.019 | 24.70 | 32 | 0.22 | 82.23 | 32 | 1.20 |
| 3000 | 2004 | 211.0 | 29 | 0.35 | 2.00 | 30 | 0.012 | 24.85 | 29 | 0.20 | 83.26 | 30 | 0.56 |
| 3000 | 2005 | 210.3 | 14 | 0.56 | 1.96 | 13 | 0.014 | 24.68 | 7  | 0.53 | 80.39 | 13 | 0.78 |
| 3000 | 2007 | 209.0 | 11 | 0.50 | 1.98 | 11 | 0.009 | 23.82 | 11 | 0.16 | 85.33 | 11 | 0.28 |
| 3000 | 2007 | 209.1 | 14 | 0.95 | 1.97 | 14 | 0.013 | 24.64 | 14 | 0.95 | 85.59 | 14 | 3.09 |
| 3000 | 2009 | 208.4 | 19 | 0.94 | 2.03 | 18 | 0.013 | 24.74 | 19 | 1.04 | 87.77 | 19 | 0.65 |
| 3000 | 2010 | 203.4 | 11 | 0.36 | 2.04 | 11 | 0.007 | 26.65 | 11 | 0.12 | 85.09 | 11 | 0.52 |
| 3000 | 2014 | 205.1 | 22 | 0.68 | 2.05 | 17 | 0.022 | 25.67 | 21 | 0.41 | 84.66 | 21 | 0.68 |
| 3000 | 2014 | 204.4 | 14 | 0.85 | 2.05 | 14 | 0.012 | 25.54 | 14 | 0.33 | 85.81 | 14 | 1.11 |

**Table S2.** The average carbonate system parameters ([NTA], [pH], [NDIC], pCO<sub>2</sub>, n- number of measurements, 3s.d.(mean) = 3s.d./√n , where s.d. – standard deviation) of the JES at nominal depths for different years

| Depth, m | year | NTA,<br>μmol/kg | n  | 3s.d.<br>(mean) | pH    | n  | 3s.d.<br>(mean) | NDIC,<br>μmol/kg | n  | 3s.d.<br>(mean) | pCO <sub>2</sub> ,<br>μatm | n  | 3s.d.<br>(mean) |
|----------|------|-----------------|----|-----------------|-------|----|-----------------|------------------|----|-----------------|----------------------------|----|-----------------|
| 750      | 1999 | 2333.3          | 56 | 1.3             | 7.762 | 56 | 0.015           | 2292.4           | 56 | 5.5             | 711.4                      | 56 | 24.3            |
| 750      | 2001 | 2333.0          | 30 | 2.0             | 7.788 | 30 | 0.020           | 2284.5           | 30 | 6.0             | 668.9                      | 30 | 30.2            |
| 750      | 2001 | 2333.4          | 21 | 2.7             | 7.815 | 21 | 0.018           | 2276.4           | 21 | 6.5             | 626.2                      | 21 | 25.7            |
| 750      | 2004 | 2332.3          | 25 | 2.7             | 7.782 | 25 | 0.018           | 2285.2           | 25 | 7.3             | 677.0                      | 25 | 32.2            |
| 750      | 2005 | 2331.6          | 12 | 2.1             | 7.767 | 12 | 0.009           | 2289.3           | 12 | 4.6             | 702.2                      | 12 | 15.5            |
| 750      | 2007 | 2329.8          | 14 | 4.5             | 7.760 | 14 | 0.016           | 2289.6           | 14 | 7.4             | 713.7                      | 14 | 26.4            |
| 750      | 2009 | 2331.6          | 24 | 1.5             | 7.750 | 24 | 0.009           | 2294.1           | 24 | 3.6             | 730.8                      | 24 | 15.0            |
| 750      | 2010 | 2332.1          | 12 | 2.4             | 7.740 | 12 | 0.012           | 2297.7           | 12 | 4.2             | 749.7                      | 12 | 20.6            |
| 750      | 2014 | 2333.0          | 29 | 1.9             | 7.733 | 29 | 0.007           | 2300.4           | 29 | 3.0             | 761.4                      | 29 | 12.6            |
| 750      | 2014 | 2333.0          | 20 | 2.9             | 7.741 | 20 | 0.017           | 2298.0           | 20 | 5.5             | 748.8                      | 20 | 28.8            |
| 1250     | 1999 | 2338.0          | 27 | 2.5             | 7.725 | 27 | 0.008           | 2303.4           | 27 | 3.0             | 732.1                      | 27 | 13.7            |
| 1250     | 2001 | 2339.4          | 30 | 1.9             | 7.741 | 30 | 0.005           | 2299.5           | 30 | 2.4             | 705.9                      | 30 | 8.3             |
| 1250     | 2001 | 2338.3          | 16 | 4.2             | 7.751 | 16 | 0.013           | 2295.1           | 16 | 6.8             | 688.7                      | 16 | 20.7            |
| 1250     | 2004 | 2339.1          | 21 | 2.4             | 7.736 | 21 | 0.004           | 2300.3           | 21 | 3.2             | 713.7                      | 21 | 7.7             |
| 1250     | 2005 | 2339.6          | 12 | 1.8             | 7.729 | 12 | 0.003           | 2303.2           | 12 | 2.7             | 727.1                      | 12 | 5.9             |
| 1250     | 2007 | 2335.9          | 8  | 9.1             | 7.730 | 8  | 0.004           | 2299.3           | 8  | 9.4             | 724.1                      | 8  | 8.0             |
| 1250     | 2009 | 2338.6          | 19 | 2.0             | 7.717 | 19 | 0.004           | 2305.4           | 19 | 2.8             | 747.1                      | 19 | 7.1             |
| 1250     | 2010 | 2338.4          | 10 | 2.6             | 7.706 | 10 | 0.005           | 2308.3           | 10 | 2.1             | 768.2                      | 10 | 8.2             |
| 1250     | 2014 | 2339.7          | 29 | 2.3             | 7.714 | 29 | 0.005           | 2307.4           | 29 | 2.9             | 754.2                      | 29 | 8.7             |
| 1250     | 2014 | 2339.6          | 16 | 2.9             | 7.712 | 15 | 0.008           | 2307.7           | 15 | 2.4             | 756.7                      | 15 | 14.1            |
| 1750     | 1999 | 2344.6          | 22 | 1.7             | 7.701 | 22 | 0.005           | 2309.9           | 22 | 2.2             | 732.6                      | 22 | 9.1             |
| 1750     | 2001 | 2345.2          | 28 | 2.2             | 7.716 | 28 | 0.002           | 2306.6           | 28 | 2.3             | 708.5                      | 28 | 3.4             |
| 1750     | 2001 | 2344.8          | 16 | 5.3             | 7.721 | 16 | 0.004           | 2304.6           | 16 | 5.7             | 700.3                      | 16 | 7.7             |
| 1750     | 2004 | 2345.8          | 21 | 2.6             | 7.715 | 21 | 0.003           | 2307.4           | 21 | 3.4             | 710.7                      | 21 | 5.7             |
| 1750     | 2005 | 2345.5          | 10 | 1.4             | 7.710 | 10 | 0.002           | 2308.6           | 10 | 1.8             | 720.3                      | 10 | 3.3             |

|      |      |        |    |     |       |    |       |        |    |     |       |    |      |
|------|------|--------|----|-----|-------|----|-------|--------|----|-----|-------|----|------|
| 1750 | 2007 | 2344.3 | 7  | 9.4 | 7.713 | 7  | 0.003 | 2307.0 | 7  | 9.2 | 713.9 | 7  | 6.0  |
| 1750 | 2009 | 2344.7 | 18 | 1.6 | 7.701 | 18 | 0.002 | 2310.3 | 18 | 1.6 | 734.8 | 18 | 4.2  |
| 1750 | 2010 | 2345.2 | 8  | 2.8 | 7.693 | 8  | 0.005 | 2312.9 | 8  | 1.6 | 749.2 | 8  | 9.0  |
| 1750 | 2014 | 2344.0 | 26 | 2.6 | 7.702 | 26 | 0.006 | 2309.2 | 26 | 3.5 | 732.4 | 26 | 10.3 |
| 1750 | 2014 | 2343.8 | 15 | 2.9 | 7.698 | 15 | 0.007 | 2310.1 | 15 | 2.9 | 739.8 | 15 | 12.5 |
| 2250 | 1999 | 2348.5 | 19 | 1.5 | 7.683 | 19 | 0.006 | 2312.9 | 19 | 2.3 | 723.6 | 19 | 10.1 |
| 2250 | 2001 | 2349.1 | 23 | 2.1 | 7.700 | 23 | 0.002 | 2308.8 | 23 | 2.1 | 697.1 | 23 | 4.5  |
| 2250 | 2001 | 2346.3 | 18 | 5.4 | 7.705 | 18 | 0.004 | 2304.8 | 18 | 5.8 | 687.5 | 18 | 6.5  |
| 2250 | 2004 | 2349.8 | 17 | 3.2 | 7.699 | 17 | 0.004 | 2310.0 | 17 | 4.1 | 699.1 | 17 | 7.0  |
| 2250 | 2005 | 2347.7 | 8  | 1.2 | 7.694 | 8  | 0.003 | 2309.4 | 8  | 1.5 | 707.2 | 8  | 5.9  |
| 2250 | 2007 | 2351.5 | 7  | 3.7 | 7.698 | 7  | 0.003 | 2312.5 | 7  | 4.2 | 700.8 | 7  | 6.0  |
| 2250 | 2009 | 2348.6 | 16 | 0.9 | 7.687 | 16 | 0.001 | 2312.3 | 16 | 0.8 | 719.0 | 16 | 2.3  |
| 2250 | 2010 | 2348.0 | 6  | 1.8 | 7.675 | 6  | 0.003 | 2314.9 | 6  | 2.2 | 740.0 | 6  | 5.6  |
| 2250 | 2014 | 2347.6 | 19 | 2.1 | 7.690 | 19 | 0.007 | 2310.3 | 19 | 3.3 | 714.0 | 19 | 12.3 |
| 2250 | 2014 | 2347.7 | 11 | 4.2 | 7.685 | 11 | 0.010 | 2311.9 | 11 | 3.8 | 722.8 | 11 | 16.3 |
| 3000 | 1999 | 2349.3 | 14 | 1.6 | 7.659 | 14 | 0.004 | 2311.3 | 14 | 1.6 | 703.7 | 14 | 7.1  |
| 3000 | 2001 | 2349.2 | 28 | 1.5 | 7.683 | 28 | 0.005 | 2304.7 | 28 | 2.7 | 666.1 | 28 | 8.9  |
| 3000 | 2001 | 2350.3 | 32 | 3.5 | 7.681 | 32 | 0.004 | 2306.3 | 32 | 3.9 | 669.5 | 32 | 6.4  |
| 3000 | 2004 | 2348.7 | 30 | 2.1 | 7.673 | 30 | 0.001 | 2307.1 | 30 | 2.1 | 681.9 | 30 | 2.7  |
| 3000 | 2005 | 2348.8 | 14 | 1.1 | 7.667 | 14 | 0.002 | 2308.9 | 14 | 1.3 | 692.6 | 14 | 4.3  |
| 3000 | 2007 | 2352.2 | 11 | 2.8 | 7.673 | 11 | 0.003 | 2310.9 | 11 | 3.3 | 681.5 | 11 | 4.5  |
| 3000 | 2009 | 2349.5 | 21 | 0.5 | 7.666 | 21 | 0.003 | 2310.1 | 21 | 1.3 | 694.6 | 21 | 5.5  |
| 3000 | 2010 | 2350.0 | 11 | 1.0 | 7.648 | 11 | 0.005 | 2314.7 | 11 | 1.4 | 725.6 | 11 | 7.9  |
| 3000 | 2014 | 2347.9 | 21 | 2.1 | 7.666 | 21 | 0.007 | 2308.1 | 21 | 2.9 | 693.6 | 21 | 12.7 |
| 3000 | 2014 | 2349.7 | 14 | 3.3 | 7.666 | 14 | 0.008 | 2309.9 | 14 | 3.1 | 693.9 | 14 | 12.9 |

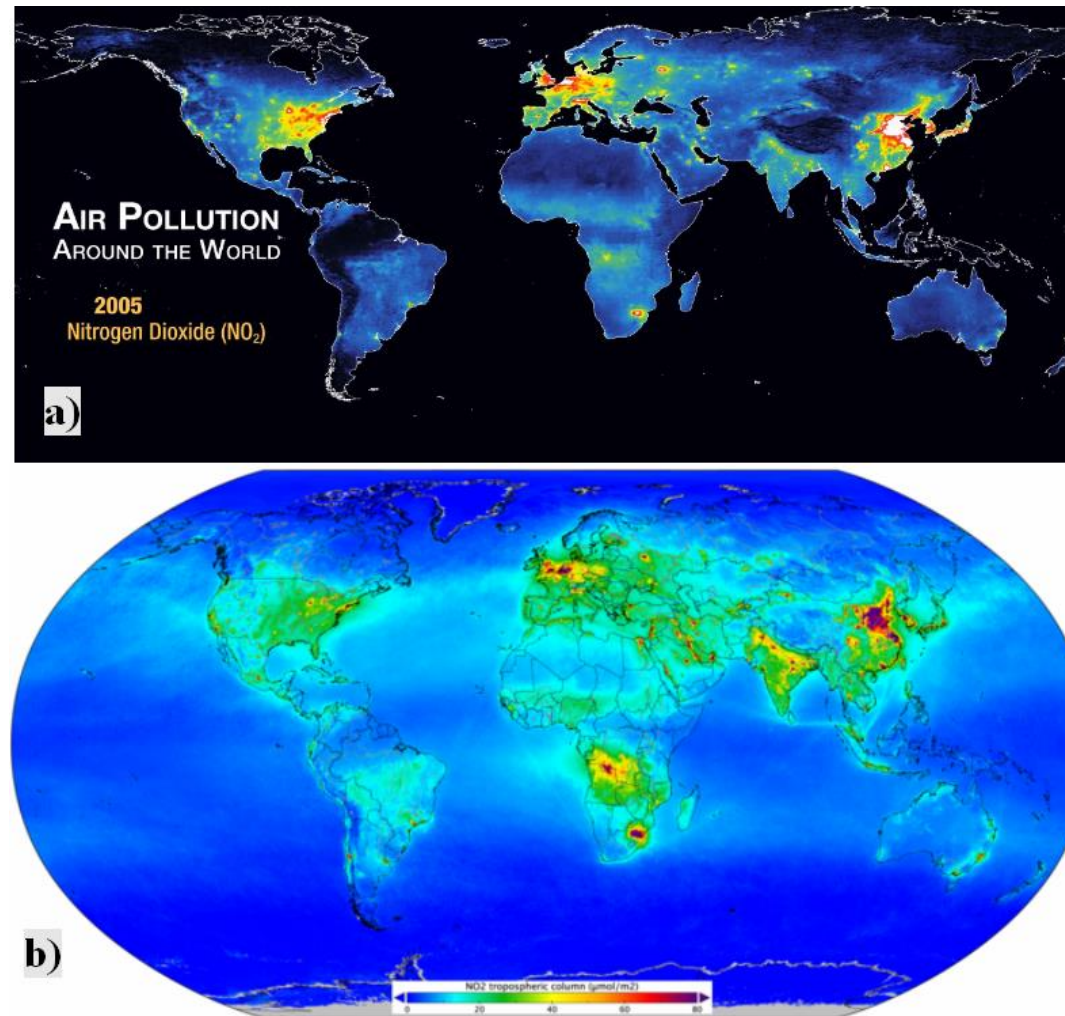

**Figure S8.** Nitrogen dioxide worldwide pollution. **a)** NASA's Earth-observing satellite, Aura, measures the air pollutant nitrogen dioxide (NO<sub>2</sub>) from high above Earth's surface. ([https://eosps0.gsfc.nasa.gov/sites/default/files/publications/NO2GlobalLenticular\\_508.pdf](https://eosps0.gsfc.nasa.gov/sites/default/files/publications/NO2GlobalLenticular_508.pdf));

**b)** Measurements gathered by the Copernicus Sentinel-5P mission between April and September 2018 have been averaged to reveal nitrogen dioxide in the atmosphere, ESA data. ([http://www.esa.int/spaceinimages/Images/2019/03/Nitrogen\\_dioxide\\_worldwide](http://www.esa.int/spaceinimages/Images/2019/03/Nitrogen_dioxide_worldwide)).
